# Supplementary material for: A graphene/carbon nanotube@π-conjugated polymer nanocomposite for high-performance organic supercapacitor electrodes
Source: Royal Society of Chemistry journal article supplement (doi:10.1039/c4ta06728b), 2015-01-01
Supplement: c4ta06728b1.pdf [file c4ta06728b1.pdf]

**Electronic Supplementary Information for**  
**A graphene/carbon nanotube@ $\pi$ -conjugated polymer**  
**nanocomposite for high-performance organic supercapacitor**  
**electrode**

Minqiang Sun, Gengchao Wang,\* Chongyang Yang, Hao Jiang, Chunzhong Li

Key Laboratory for Ultrafine Materials of Ministry of Education, Shanghai Key Laboratory of Advanced Polymeric Materials, School of Materials Science and Engineering, East China University of Science and Technology, Shanghai 200237, P.R.China

\*Email: gengchaow@ecust.edu.cn

## Experimental section

### Data analysis of electrochemical measurements

The specific capacitance of the three-electrode system ( $C_s$ ) was calculated by using the following equation:

$$C_s = I dt / (m dV) \quad (1)$$

in which  $C_s$  (F g<sup>-1</sup>) is the specific capacitance,  $I$  (A) is the discharge current,  $dt$  (s) is the discharge time,  $m$  (g) is the mass of the active material loaded in working electrode, and  $dV$  (V) is the potential window after IR drop.

The specific capacitance of the two-electrode cell configuration ( $C_{\text{cell}}$ ) was calculated by using the following equation:

$$C_{\text{cell}} = I dt / (m dV) \quad (2)$$

in which  $C_{\text{cell}}$  (F g<sup>-1</sup>) is the specific capacitance,  $I$  (A) is the discharge current,  $dt$  (s) is the discharge time,  $m$  (g) is the total mass of negative and positive electrodes, and  $dV$  (V) is the potential window after IR drop. The energy density ( $E$ , Wh kg<sup>-1</sup>) and the power density ( $P$ , W kg<sup>-1</sup>) for the two-electrode cell can be obtained using the following equations:

$$E = 0.5 C_{\text{cell}} V^2 / 3.6 \quad (3)$$

$$P = 3600 E / dt \quad (4)$$

in which  $C_{\text{cell}}$  ( $\text{F g}^{-1}$ ) is the specific capacitance of the two-electrode cell,  $V$  (V) is the potential window after IR drop, and  $dt$  (s) is the discharge time.

## Results and discussion

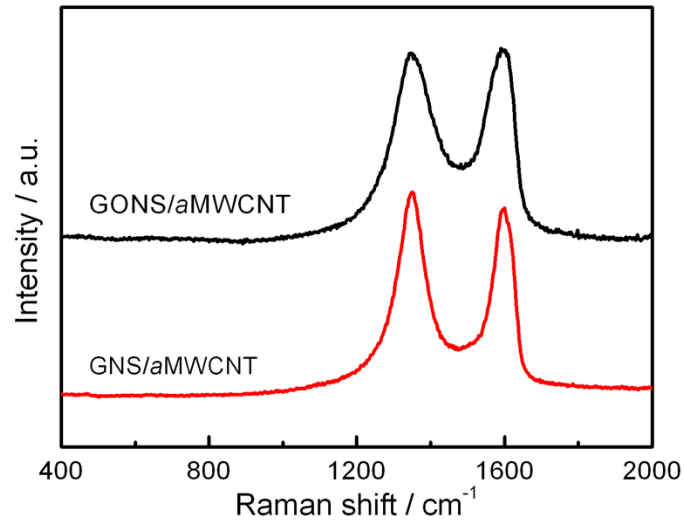

**Fig. S1** Raman spectra of GONS/aMWCNT and GNS/aMWCNT.

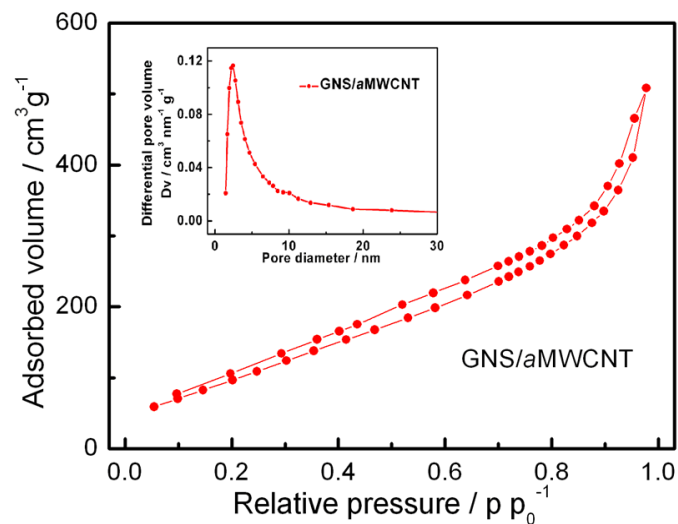

**Fig. S2**  $\text{N}_2$  adsorption/desorption isotherm of GNS/aMWCNT. The inset is the corresponding pore-size distribution.

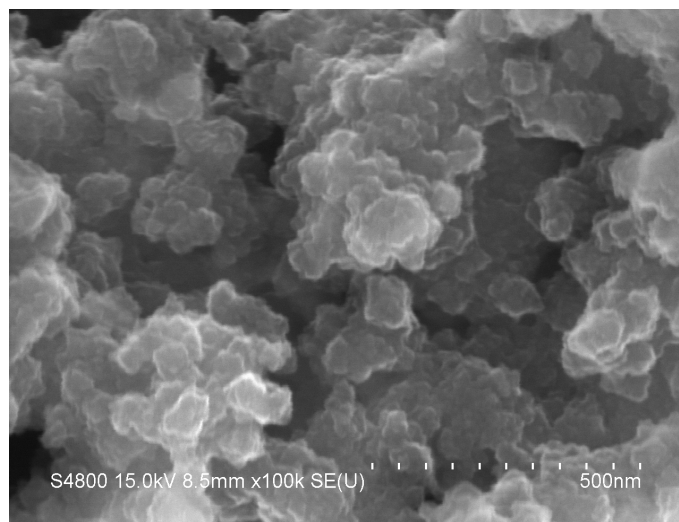

**Fig. S3** FE-SEM image of pure PDAA.

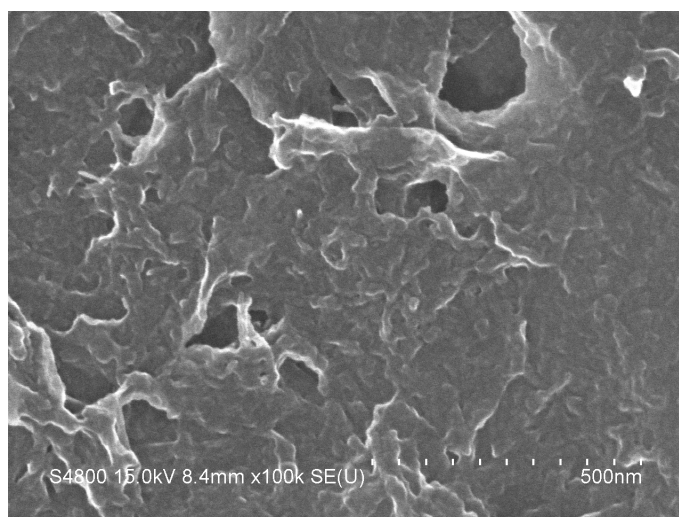

**Fig. S4** FE-SEM image of GNS/aMWCNT@PDAA without CSA.

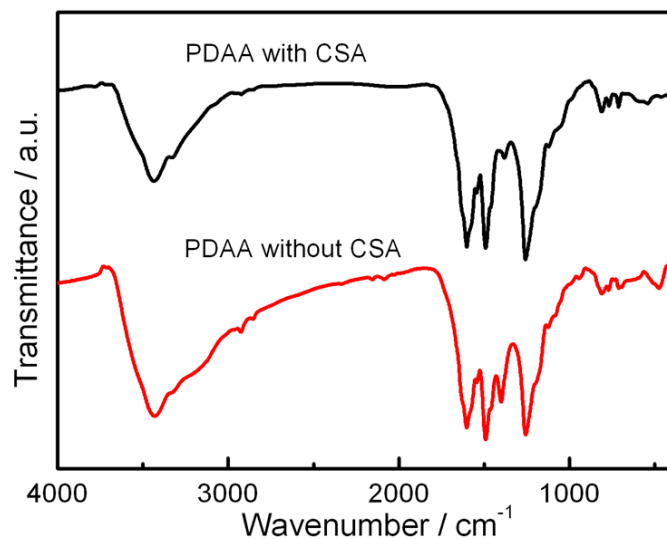

**Fig. S5** FTIR spectra of PDAA doped with CSA and PDAA without CSA.

**Tab. S1** XPS results of PDAA and GNS/*a*MWCNT@PDAA for element content, bond assignment and so on.

| Samples                  | Element content (%) |      |      | Bond assignment (%) |         |                   |                   | (=N <sup>+</sup> + -N <sup>+</sup> ) | =N-    |
|--------------------------|---------------------|------|------|---------------------|---------|-------------------|-------------------|--------------------------------------|--------|
|                          | C                   | N    | O    | =N-                 | -NH-    | =N <sup>+</sup> - | -N <sup>+</sup> - | / N <sub>total</sub>                 | / -NH- |
|                          |                     |      |      | 398.9eV             | 399.5eV | 400.2eV           | 401.2eV           | (%)                                  | (%)    |
| PDAA                     | 70.0                | 11.3 | 18.7 | 31.0                | 43.3    | 18.6              | 7.1               | 0.26                                 | 0.72   |
| GNS/ <i>a</i> MWCNT@PDAA | 72.1                | 8.3  | 19.6 | 31.2                | 34.0    | 26.1              | 8.7               | 0.35                                 | 0.92   |

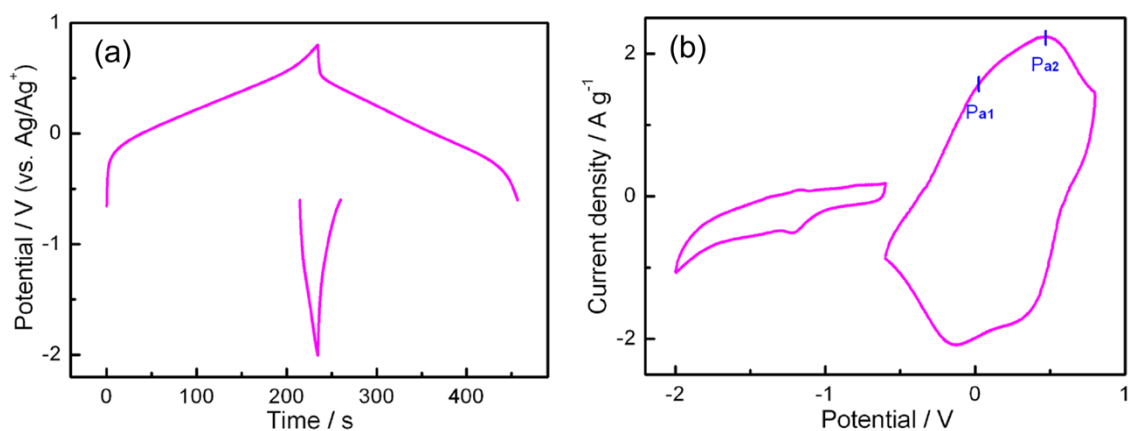

**Fig. S6** (a) Comparative charge/discharge curves at a current density of  $1 \text{ A g}^{-1}$  and (b) comparative CV curves at a scan rate of  $10 \text{ mV s}^{-1}$  for GNS/*a*MWCNT@PANI recorded by a three-electrode system in half potential window for the negative and positive part in  $1 \text{ M Et}_4\text{NBF}_4\text{-AN}$  electrolyte.

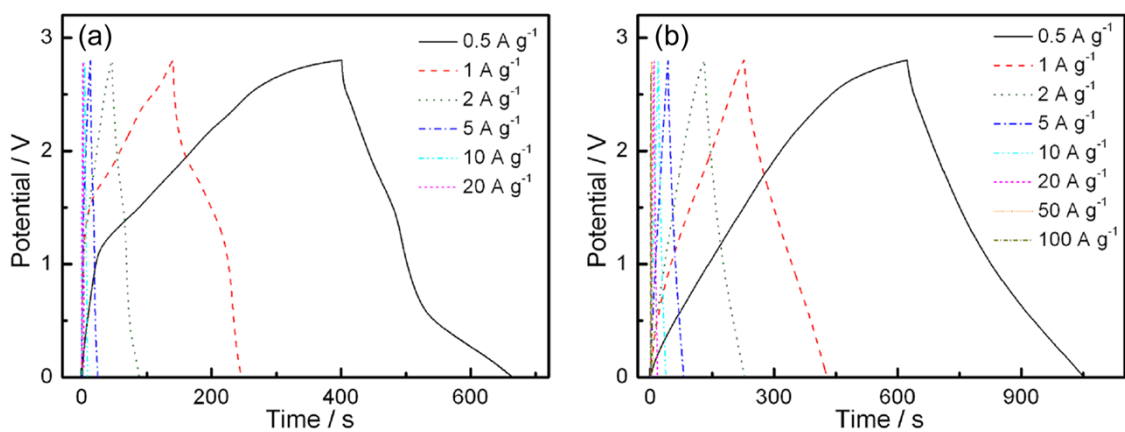

**Fig. S7** Galvanostatic charge/discharge curves of (a) PDAA and (b) GNS/*a*MWCNT@PDAA at different current densities ranging from  $0.5 \text{ A g}^{-1}$  to  $100 \text{ A g}^{-1}$ .

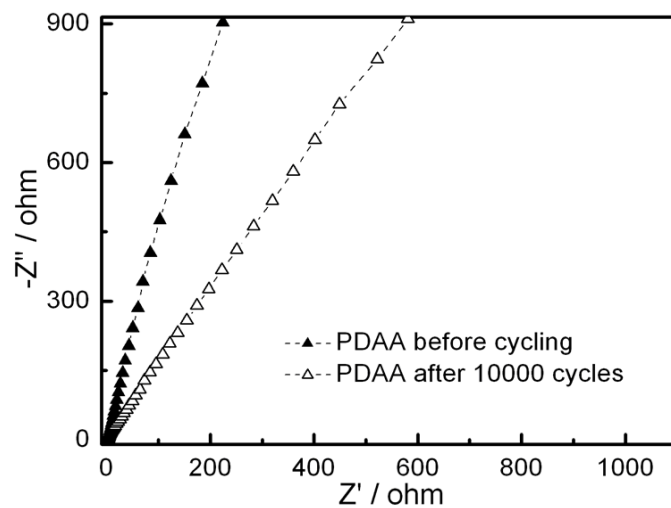

**Fig. S8** Nyquist plots of PDAA before cycling and after 10000 cycles.

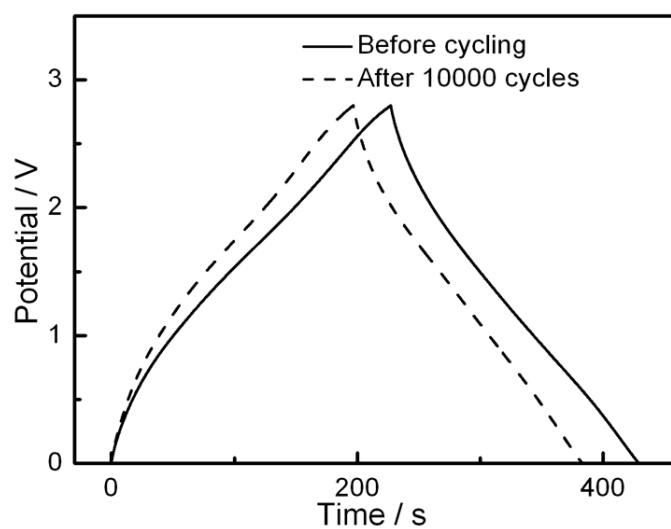

**Fig. S9** Galvanostatic charge/discharge curves of GNS/aMWCNT@PDAA before cycling and after 10000 cycles at a current density of 1 A g<sup>-1</sup>.
